# Supplementary material
Source: ML conference proceedings conference paper supplement (https://www.ecva.net/papers/eccv_2020/papers_ECCV/html/123660086_ECCV_2020_paper.php)
Supplement: Supplementary file 1 [file 123660086-supp.pdf]

# Placepedia: Comprehensive Place Understanding with Multi-Faceted Annotations (Supplementary Material)

Huaiyi Huang<sup>[0000-0003-1548-2498]</sup>, Yuqi Zhang<sup>[0000-0003-1883-4081]</sup>,  
Qingqiu Huang<sup>[0000-0002-6467-1634]</sup>, Zhengkui Guo<sup>[0000-0002-8093-7578]</sup>,  
Ziwei Liu<sup>[0000-0002-4220-5958]</sup>, and Dahua Lin<sup>[0000-0002-8865-7896]</sup>

The Chinese University of Hong Kong  
{hh016,zy016,hq016,gz019,dhlin}@ie.cuhk.edu.hk, zwliu.hust@gmail.com

**Abstract.** This document provides: 1) annotation interface of Placepedia; 2) additional results on place understanding and city embedding.

## 1 Annotation Interface

Fig. 1 shows the interface of the annotation tool.

## 2 Additional Results

### 2.1 Country Recognition

Fig. 2 shows the results of country recognition. They reveal similar findings to city recognition. Although places can be wrongly classified to another country, the prediction often belongs to the same continent with the ground truth country. For instance, Australia and New Zealand are both in Oceania; Iceland, Ireland, and Italy are all in Europe.

### 2.2 Weights of Economy, Culture, and Politics

Tab. 1 shows the weights of economy, culture, and politics for all cities of Places-Fine, which are computed as in [1]. Lists of pre-defined economic/cultural/political keywords are provided therein. We use the leading paragraphs of Wikipedia pages as city description, and calculate the frequencies of these three types of keywords. By normalizing the frequencies we get the weights of economy, culture, and politics for each city.

## References

1. Son, J.S., Thill, J.C.: Is your city economic, cultural, or political? recognition of city image based on multidimensional scaling of quantified web pages. In: Spatial Analysis and Location Modeling in Urban and Regional Systems, pp. 63–95. Springer (2018)

**Table 1.** The weights of economy, culture, and politics of 50 cities of Places-Fine, which are computed as in [1], using the leading paragraphs of Wikipedia pages as city description

| City          | Country / Territory      | Continent     | Economic keywords | Cultural keywords | Political keywords |
|---------------|--------------------------|---------------|-------------------|-------------------|--------------------|
| Amsterdam     | Netherlands              | Europe        | 0.331             | 0.294             | 0.375              |
| Athens        | Greece                   | Europe        | 0.299             | 0.278             | 0.424              |
| Auckland      | New Zealand              | Oceania       | 0.320             | 0.310             | 0.370              |
| Bangkok       | Thailand                 | Asia          | 0.341             | 0.307             | 0.352              |
| Barcelona     | Spain                    | Europe        | 0.336             | 0.336             | 0.328              |
| Beijing       | China                    | Asia          | 0.345             | 0.310             | 0.345              |
| Berlin        | Germany                  | Europe        | 0.323             | 0.263             | 0.414              |
| Boston        | United States of America | North America | 0.317             | 0.292             | 0.392              |
| Buenos Aires  | Argentina                | South America | 0.310             | 0.296             | 0.394              |
| Cairo         | Egypt                    | Africa        | 0.333             | 0.282             | 0.385              |
| Cape Town     | South Africa             | Africa        | 0.358             | 0.245             | 0.396              |
| Delhi         | India                    | Asia          | 0.320             | 0.262             | 0.418              |
| Dubai         | United Arab Emirates     | Asia          | 0.426             | 0.259             | 0.315              |
| Dublin        | Ireland                  | Europe        | 0.320             | 0.280             | 0.400              |
| Florence      | Italy                    | Europe        | 0.323             | 0.338             | 0.338              |
| Guadalajara   | Mexico                   | North America | 0.394             | 0.282             | 0.324              |
| Hong Kong     | Hong Kong                | Asia          | 0.315             | 0.204             | 0.481              |
| Istanbul      | Turkey                   | Europe / Asia | 0.317             | 0.275             | 0.408              |
| Kuala Lumpur  | Malaysia                 | Asia          | 0.272             | 0.272             | 0.456              |
| Las Vegas     | United States of America | North America | 0.319             | 0.319             | 0.362              |
| London        | United Kingdom           | Europe        | 0.335             | 0.335             | 0.330              |
| Los Angeles   | United States of America | North America | 0.326             | 0.302             | 0.372              |
| Macau         | Macau                    | Asia          | 0.349             | 0.233             | 0.419              |
| Madrid        | Spain                    | Europe        | 0.286             | 0.299             | 0.416              |
| Mecca         | Saudi Arabia             | Asia          | 0.288             | 0.288             | 0.425              |
| Mexico City   | Mexico                   | North America | 0.308             | 0.260             | 0.432              |
| Miami         | United States of America | North America | 0.360             | 0.315             | 0.326              |
| Milan         | Italy                    | Europe        | 0.341             | 0.287             | 0.372              |
| New York City | United States of America | North America | 0.328             | 0.323             | 0.349              |
| Orlando       | United States of America | North America | 0.313             | 0.297             | 0.391              |
| Osaka         | Japan                    | Asia          | 0.303             | 0.242             | 0.455              |
| Oslo          | Norway                   | Europe        | 0.400             | 0.247             | 0.353              |
| Paris         | France                   | Europe        | 0.323             | 0.311             | 0.366              |
| Philadelphia  | United States of America | North America | 0.325             | 0.299             | 0.376              |
| Prague        | Czech Republic           | Europe        | 0.326             | 0.304             | 0.370              |
| Reykjavík     | Iceland                  | Europe        | 0.321             | 0.286             | 0.393              |
| Rome          | Italy                    | Europe        | 0.328             | 0.259             | 0.414              |
| San Francisco | United States of America | North America | 0.322             | 0.308             | 0.370              |
| São Paulo     | Brazil                   | North America | 0.333             | 0.306             | 0.361              |
| Seoul         | South Korea              | Asia          | 0.341             | 0.302             | 0.357              |
| Shanghai      | China                    | Asia          | 0.373             | 0.273             | 0.355              |
| Shenzhen      | China                    | Asia          | 0.339             | 0.303             | 0.358              |
| Singapore     | Singapore                | Asia          | 0.311             | 0.316             | 0.373              |
| Sydney        | Australia                | Oceania       | 0.333             | 0.311             | 0.356              |
| Taipei        | Taiwan                   | Asia          | 0.318             | 0.291             | 0.391              |
| Tokyo         | Japan                    | Asia          | 0.317             | 0.289             | 0.394              |
| Toronto       | Canada                   | North America | 0.340             | 0.321             | 0.340              |
| Vancouver     | Canada                   | North America | 0.315             | 0.324             | 0.360              |
| Venice        | Italy                    | Europe        | 0.306             | 0.296             | 0.398              |
| Vienna        | Austria                  | Europe        | 0.306             | 0.298             | 0.397              |

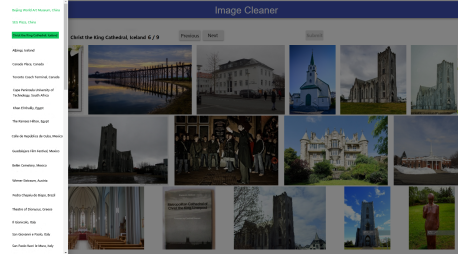

**Fig. 1.** Interface of the annotation tool. The left column lists all places. Text in green means that images of the place have been annotated; Text with green background represents the current place to clean; Text in black indicates places waiting to be cleaned

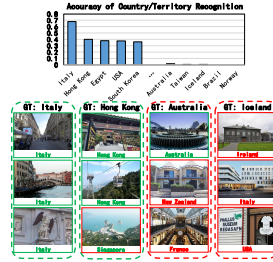

**Fig. 2.** The table shows the most and the least accurate 5 classes of country recognition. Below the table are 4 sets of examples, including 2 green/red dash boxes representing sample classes with high/low accuracies. Inside each dash box is the ground truth at the top and three images associated with predicted labels. Green/red solid boxes of images mean right/wrong predictions
